# Supplementary material
Source: HighWire-hosted journal article supplement (https://cmajopen.ca/highwire/filestream/89804/field_highwire_adjunct_files/1/open-2022-0061-2-at.pdf)

## Appendix B: Neighbourhood-level differences in travel burden

**Figure B.1.** Neighbourhood-level difference in travel burden to language-concordant family physicians for the general population and for French-only speakers. Positive values (redder colouration) indicate excess travel burden for French-only speakers, negative values (bluer colouration) show reduced travel burdens. Colour scales are centred around 0 (light grey). [Contains information licensed under the Open Government Licence – City of Ottawa \(https://ottawa.ca/en/city-hall/open-transparent-and-accountable-government/open-data\)](https://ottawa.ca/en/city-hall/open-transparent-and-accountable-government/open-data).

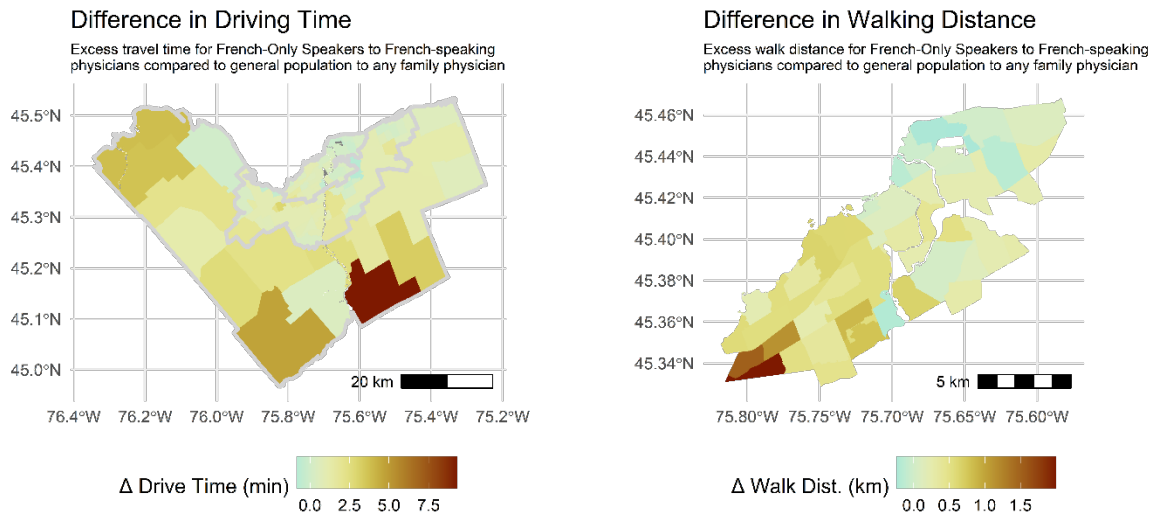

Supplement: open-2022-0061-2-at.pdf [file open-2022-0061-2-at.pdf]
